# Supplementary material for: Identification of movement synchrony: Validation of windowed cross-lagged correlation and -regression with peak-picking algorithm
Source: PLoS One. 2019 Feb 11;14(2):e0211494. doi: 10.1371/journal.pone.0211494 (PMC6370201; doi:10.1371/journal.pone.0211494)
Supplement: S2 Table — (DOCX) [file pone.0211494.s004.docx]

**Table S2. Coefficients and significance of the ordinal logistic mixed effects regression (criterion IR by kappa, MSI) for all conditions.**

| Parameter | Artificial condition | Naturally isolated condition | Naturally embedded condition |
| --- | --- | --- | --- |
| Method | reference group: method= WCLC | | |
| WCLR | 2.33* | 1.51* | 0.64* |
| Smoothing | reference group: smoothing = raw data | | |
| Slight | -0.11 | 0.09 | -0.18 |
| High | -1.53 | -0.00 | -0.25+ |
| Transformation | reference group: transformation = raw data | | |
| Size-standardization | -0.11 | 0.08 | -0.01 |
| Log-transformation | 0.16+ | 0.27* | -0.40* |
| Anscombe-transformation | 0.39* | 0.27* | 0.25+ |
| Bandwidth | reference group: bandwidth = 75 | | |
| 125 | -0.00 | -0.00 | -0.00 |
| 175 | 1.92* | -0.05 | 0.15 |
| 250 | 0.18* | -0.64* | 1.17* |
| 750 | -7.89* | -7.82* | -0.27 |
| *R²* cut-off | reference group: *R²* cut-off = 0.0 | | |
| 0.1 | 1.72* | 0.84* | 0.09 |
| 0.2 | 1.72* | 0.84* | 0.09 |
| 0.25 | 3.36* | 1.92* | -0.05 |
| 0.30 | 1.72* | 0.84* | 0.09 |
| Var (u0) | 0.81* | 0.48* | 3.38* |
| Thresholds |  |  |  |
| bad | ok | 0.54 | 1.77* | 4.16* |
| ok | good | 2.89* | 3.77* | 5.42* |

Note. * indicates significant results on a 5% alpha level, + indicates significant results on a 10% alpha level, WCLR = Windowed cross-lagged regression.
